# Supplementary material for: Elucidating the genetic architecture of reproductive ageing in the Japanese population
Source: PubMed Central journal article supplement (PMC5958096; doi:10.1038/s41467-018-04398-z), 2018-05-17

## Supplementary Information

Elucidating the genetic architecture of reproductive ageing in the Japanese population

Horikoshi et al.

|                        |                                                                                                                                                   |
|------------------------|---------------------------------------------------------------------------------------------------------------------------------------------------|
| Supplementary Table 1  | Study information for Biobank Japan and UK Biobank                                                                                                |
| Supplementary Table 2  | The impact of birth year on age at menarche and heritability                                                                                      |
| Supplementary Table 3  | GTEx tissue enrichment results performed using LDSC-SEG                                                                                           |
| Supplementary Table 4  | Pre- and peri-pubertal changes in rat medial basal hypothalamus expression of 20 receptor-like protein tyrosine phosphatase ( <i>PTPR</i> ) genes |
| Supplementary Table 5  | mRNA primer sequences used in animal model work                                                                                                   |
| Supplementary Figure 1 | Concordance of effect estimates / allele frequencies with available Chinese data for known European SNPs (menarche)                               |
| Supplementary Figure 2 | Concordance of effect estimates / allele frequencies with available Chinese data for known European SNPs (menopause)                              |
| Supplementary Figure 3 | Tissue enrichment analysis performed using MAGMA                                                                                                  |

**Supplementary Table 1. Study Information of BioBank Japan and UK Biobank**

| Birth year                                 | N       | Age at recruitment (mean (SD)) | BMI (mean (SD)) | Current/past/never smoker/unknown (N) | Ever smoker (%) | Never smoker (%) |
|--------------------------------------------|---------|--------------------------------|-----------------|---------------------------------------|-----------------|------------------|
| <b>(a) Menarche samples in BBJ</b>         |         |                                |                 |                                       |                 |                  |
| <1934                                      | 18,444  | 77.4 (4.7)                     | 22.9 (3.7)      | 978/1395/15964/107                    | 2373 (12.9%)    | 15964 (86.6%)    |
| 1934-45                                    | 21,835  | 65.7 (3.6)                     | 23.3 (3.7)      | 1899/1924/17897/115                   | 3823 (17.5%)    | 17897 (82.0%)    |
| 1946-65                                    | 19,703  | 51.5 (5.8)                     | 23.1 (4.0)      | 3480/2323/13759/141                   | 5803 (29.5%)    | 13759 (69.8%)    |
| >1965                                      | 7,048   | 31.8 (5.9)                     | 21.9 (4.1)      | 1631/723/4652/41                      | 2354 (33.4%)    | 4652 (66.0%)     |
| All                                        | 67,029  | 61.2 (14.9)                    | 23.0 (3.9)      | 7988/6365/52272/404                   | 14953 (22.3%)   | 52272 (78.0%)    |
| <b>(b) Menarche samples in UK Biobank</b>  |         |                                |                 |                                       |                 |                  |
| 1934-45                                    | 63,839  | 65.8 (2.1)                     | 27.3 (4.8)      | 4111/23558/36143/27                   | 27669 (43.3%)   | 36143 (56.6%)    |
| 1946-71                                    | 174,525 | 53.2 (6.5)                     | 26.9 (5.3)      | 17150/53670/103618/87                 | 70820 (40.5%)   | 103618 (59.4%)   |
| All                                        | 238,364 | 56.6 (7.9)                     | 27.1 (5.2)      | 21261/77228/139761/114                | 98489 (41.3%)   | 139761 (58.6%)   |
| <b>(c) Menopause samples in BBJ</b>        |         |                                |                 |                                       |                 |                  |
| All                                        | 43,861  | 68.1 (9.2)                     | 23.3 (3.9)      | 3979/3728/35912/242                   | 7707 (17.7%)    | 35912 (81.9%)    |
| <b>(d) Menopause samples in UK Biobank</b> |         |                                |                 |                                       |                 |                  |
| All                                        | 108,817 | 59.6 (5.6)                     | 26.9 (5.0)      | 8709/36208/63854/46                   | 44917 (41.3%)   | 63854 (58.7%)    |

SD, standard deviation; BMI, body mass index.

**Supplementary Table 2. The impact of birth year on age at menarche and heritability**

| Birth year | N      | Median | Mean  | SD   | $h^2g$ |
|------------|--------|--------|-------|------|--------|
| <1934      | 18,444 | 15     | 15.19 | 1.98 | 14.2%  |
| 1934-45    | 21,835 | 14     | 14.16 | 1.57 | 14.8%  |
| 1946-65    | 19,703 | 13     | 12.93 | 1.39 | 17.6%  |
| >1965      | 7,048  | 12     | 12.34 | 1.35 | 20.6%  |

SD, standard deviation.

**Supplementary Table 3. GTEx tissue enrichment results performed using LDSC-SEG**

| Cell type                               | Menarche (GTEx) |                           |                         | Menopause (GTEx) |                           |                         |
|-----------------------------------------|-----------------|---------------------------|-------------------------|------------------|---------------------------|-------------------------|
|                                         | Coefficient     | Coefficient_<br>std_error | Coefficient_<br>P_value | Coefficient      | Coefficient_<br>std_error | Coefficient_<br>P_value |
| Brain_Hypothalamus                      | 1.2E-08         | 3.7E-09                   | 0.00037                 | 4.7E-09          | 5.6E-09                   | 0.203                   |
| Brain_Amygdala                          | 1.1E-08         | 3.5E-09                   | 0.00070                 | 3.4E-09          | 5.3E-09                   | 0.259                   |
| Brain_Anterior_cingulate_cortex_(BA24)  | 1.1E-08         | 3.5E-09                   | 0.00073                 | 1.9E-09          | 5.5E-09                   | 0.369                   |
| Brain_Caudate_(basal_ganglia)           | 1.1E-08         | 3.6E-09                   | 0.00105                 | 1.6E-10          | 5.0E-09                   | 0.487                   |
| Brain_Nucleus_accumbens_(basal_ganglia) | 1.1E-08         | 3.7E-09                   | 0.00150                 | -7.5E-10         | 5.2E-09                   | 0.557                   |
| Brain_Hippocampus                       | 1.0E-08         | 3.5E-09                   | 0.00151                 | 4.9E-09          | 5.3E-09                   | 0.177                   |
| Brain_Putamen_(basal_ganglia)           | 1.1E-08         | 3.8E-09                   | 0.00197                 | -6.4E-10         | 5.1E-09                   | 0.550                   |
| Brain_Cortex                            | 1.1E-08         | 3.7E-09                   | 0.00212                 | 7.8E-10          | 5.7E-09                   | 0.445                   |
| Brain_Substantia_nigra                  | 1.0E-08         | 3.6E-09                   | 0.00270                 | -2.1E-09         | 5.3E-09                   | 0.653                   |
| Brain_Frontal_Cortex_(BA9)              | 9.4E-09         | 3.6E-09                   | 0.00394                 | -1.8E-10         | 5.6E-09                   | 0.513                   |
| Brain_Cerebellar_Hemisphere             | 9.6E-09         | 3.7E-09                   | 0.00463                 | -2.1E-09         | 5.5E-09                   | 0.645                   |
| Fallopian_Tube                          | 7.9E-09         | 4.0E-09                   | 0.02374                 | 9.6E-09          | 6.4E-09                   | 0.067                   |
| Adrenal_Gland                           | 7.2E-09         | 4.3E-09                   | 0.04873                 | 7.5E-09          | 7.3E-09                   | 0.154                   |
| Brain_Cerebellum                        | 6.1E-09         | 3.8E-09                   | 0.05163                 | -4.3E-09         | 5.7E-09                   | 0.774                   |
| Pituitary                               | 6.4E-09         | 4.4E-09                   | 0.07210                 | -1.9E-09         | 7.1E-09                   | 0.608                   |
| Muscle_Skeletal                         | 6.1E-09         | 4.3E-09                   | 0.07946                 | 3.3E-09          | 7.2E-09                   | 0.323                   |
| Cervix_Ectocervix                       | 6.1E-09         | 4.6E-09                   | 0.09308                 | 3.5E-09          | 6.9E-09                   | 0.308                   |
| Brain_Spinal_cord_(cervical_c-1)        | 4.7E-09         | 3.9E-09                   | 0.11343                 | -2.3E-09         | 5.5E-09                   | 0.662                   |
| Thyroid                                 | 4.0E-09         | 3.6E-09                   | 0.13139                 | 5.1E-09          | 6.6E-09                   | 0.221                   |
| Prostate                                | 4.5E-09         | 4.3E-09                   | 0.15081                 | -2.6E-09         | 7.5E-09                   | 0.637                   |
| Vagina                                  | 3.6E-09         | 3.9E-09                   | 0.17567                 | 5.5E-09          | 6.0E-09                   | 0.181                   |
| Heart_Left_Ventricle                    | 2.5E-09         | 3.7E-09                   | 0.24679                 | 1.3E-08          | 6.5E-09                   | 0.027                   |
| Esophagus_Muscularis                    | 2.1E-09         | 3.6E-09                   | 0.28330                 | 6.6E-09          | 6.3E-09                   | 0.148                   |
| Bladder                                 | 2.2E-09         | 3.8E-09                   | 0.28436                 | 1.3E-08          | 6.7E-09                   | 0.024                   |
| Esophagus_Mucosa                        | 1.1E-09         | 3.6E-09                   | 0.37734                 | -1.2E-08         | 7.2E-09                   | 0.955                   |
| Colon_Sigmoid                           | 8.8E-10         | 3.9E-09                   | 0.41148                 | 1.8E-08          | 6.8E-09                   | 0.005                   |
| Cervix_Endocervix                       | 7.0E-10         | 4.2E-09                   | 0.43333                 | 8.2E-09          | 6.8E-09                   | 0.114                   |
| Minor_Salivary_Gland                    | 5.9E-10         | 3.8E-09                   | 0.43767                 | 4.5E-09          | 6.6E-09                   | 0.245                   |
| Colon_Transverse                        | 2.5E-10         | 4.8E-09                   | 0.47878                 | 2.0E-08          | 9.2E-09                   | 0.017                   |
| Cells_Transformed_fibroblasts           | -2.4E-10        | 4.0E-09                   | 0.52356                 | -3.5E-09         | 7.1E-09                   | 0.688                   |
| Adipose_Subcutaneous                    | -2.3E-10        | 3.7E-09                   | 0.52470                 | 4.2E-09          | 7.1E-09                   | 0.279                   |
| Testis                                  | -8.2E-10        | 3.8E-09                   | 0.58416                 | -7.2E-09         | 6.1E-09                   | 0.883                   |
| Heart_Atrial_Appendage                  | -8.5E-10        | 3.6E-09                   | 0.59311                 | 2.4E-09          | 6.6E-09                   | 0.360                   |
| Artery_Coronary                         | -9.3E-10        | 3.8E-09                   | 0.59740                 | 5.1E-10          | 7.0E-09                   | 0.471                   |
| Nerve_Tibial                            | -1.2E-09        | 3.8E-09                   | 0.62426                 | 3.2E-09          | 6.8E-09                   | 0.322                   |
| Skin_Sun_Exposed_(Lower_leg)            | -1.2E-09        | 3.5E-09                   | 0.63091                 | 5.7E-09          | 7.0E-09                   | 0.209                   |
| Small_Intestine_Terminal_Ileum          | -1.5E-09        | 4.2E-09                   | 0.63766                 | 1.3E-08          | 9.0E-09                   | 0.081                   |
| Whole_Blood                             | -1.7E-09        | 4.5E-09                   | 0.64322                 | 9.2E-10          | 7.8E-09                   | 0.453                   |
| Ovary                                   | -1.6E-09        | 3.9E-09                   | 0.66429                 | 1.1E-08          | 6.8E-09                   | 0.056                   |
| Breast_Mammary_Tissue                   | -1.6E-09        | 3.3E-09                   | 0.68394                 | 6.6E-09          | 7.6E-09                   | 0.190                   |
| Stomach                                 | -2.1E-09        | 3.7E-09                   | 0.71467                 | 3.4E-09          | 7.8E-09                   | 0.333                   |
| Uterus                                  | -2.4E-09        | 3.8E-09                   | 0.73400                 | 5.0E-09          | 7.0E-09                   | 0.236                   |
| Adipose_Visceral_(Omentum)              | -2.5E-09        | 3.7E-09                   | 0.74907                 | 5.9E-09          | 8.1E-09                   | 0.233                   |
| Esophagus_Gastroesophageal_Junction     | -2.7E-09        | 3.7E-09                   | 0.76480                 | 1.4E-08          | 7.2E-09                   | 0.023                   |
| Liver                                   | -2.9E-09        | 3.5E-09                   | 0.79079                 | -3.9E-09         | 6.4E-09                   | 0.728                   |
| Pancreas                                | -3.4E-09        | 3.9E-09                   | 0.80489                 | -7.2E-09         | 6.4E-09                   | 0.872                   |
| Spleen                                  | -4.7E-09        | 4.6E-09                   | 0.84278                 | -1.2E-09         | 7.5E-09                   | 0.561                   |
| Skin_Not_Sun_Exposed_(Suprapubic)       | -3.7E-09        | 3.7E-09                   | 0.84644                 | 5.4E-09          | 7.0E-09                   | 0.221                   |
| Cells_EBV-transformed_lymphocytes       | -4.6E-09        | 4.2E-09                   | 0.86100                 | 6.5E-09          | 7.7E-09                   | 0.198                   |
| Kidney_Cortex                           | -4.4E-09        | 3.9E-09                   | 0.87043                 | -1.5E-09         | 6.6E-09                   | 0.590                   |
| Artery_Aorta                            | -4.6E-09        | 3.7E-09                   | 0.89199                 | 8.4E-09          | 6.6E-09                   | 0.100                   |
| Artery_Tibial                           | -4.7E-09        | 3.7E-09                   | 0.89844                 | 8.5E-09          | 6.4E-09                   | 0.090                   |
| Lung                                    | -6.6E-09        | 3.8E-09                   | 0.96047                 | 1.4E-08          | 7.7E-09                   | 0.038                   |

Table shown is default output format for LDSC-SEG cell-type specific heritability analyses.  
 "Coefficient\_P\_value" represents the main association statistic used to judge significance.

**Supplementary Table 4. Pre- and peri-pubertal changes in rat medial basal hypothalamus expression of 20 receptor-like protein tyrosine phosphatase (*PTPR*) genes**

| Gene Symbol   | Expression levels |       |            |            |               | FDR     | FDR     |
|---------------|-------------------|-------|------------|------------|---------------|---------|---------|
|               | PND7              | PND14 | PND21 (EJ) | PND28 (LJ) | PND32-38 (LP) | PND7-21 | PND7-LP |
| <i>PTPRA</i>  | 1                 | 1.00  | 1.10       | 1.11       | 1.08          | 1.2E-01 | 2.0E-01 |
| <i>PTPRB</i>  | 1                 | 1.26  | 1.12       | 1.24       | 1.30          | 3.0E-01 | 1.4E-02 |
| <i>PTPRC</i>  | 1                 | 1.10  | 1.33       | 1.31       | 1.54          | 2.6E-03 | 4.9E-06 |
| <i>PTPRD</i>  | 1                 | 0.98  | 0.75       | 0.84       | 0.88          | 1.9E-03 | 1.8E-01 |
| <i>PTPRE</i>  | 1                 | 1.22  | 1.01       | 1.15       | 1.13          | 9.1E-01 | 2.9E-01 |
| <i>PTPRF</i>  | 1                 | 0.91  | 0.82       | 0.91       | 0.92          | 2.2E-03 | 2.2E-01 |
| <i>PTPRG</i>  | 1                 | 1.02  | 0.76       | 0.85       | 0.88          | 1.1E-03 | 1.3E-01 |
| <i>PTPRH</i>  | 1                 | 1.22  | 1.03       | 0.91       | 0.99          | 9.4E-01 | 9.9E-01 |
| <i>PTPRJ</i>  | 1                 | 1.11  | 1.37       | 1.39       | 1.36          | 3.9E-09 | 4.4E-09 |
| <i>PTPRK</i>  | 1                 | 1.07  | 0.79       | 0.88       | 0.81          | 1.4E-03 | 3.5E-03 |
| <i>PTPRM</i>  | 1                 | 1.14  | 1.30       | 1.36       | 1.28          | 3.0E-04 | 5.7E-04 |
| <i>PTPRN</i>  | 1                 | 1.31  | 1.90       | 2.01       | 1.99          | 1.9E-33 | 2.3E-37 |
| <i>PTPRN2</i> | 1                 | 1.29  | 1.25       | 1.35       | 1.39          | 1.8E-04 | 8.8E-08 |
| <i>PTPRO</i>  | 1                 | 0.91  | 0.85       | 0.90       | 0.86          | 1.0E-02 | 1.6E-02 |
| <i>PTPRQ</i>  | 1                 | 1.21  | 0.98       | 0.83       | 0.88          | 1.0E+00 | 6.0E-01 |
| <i>PTPRR</i>  | 1                 | 1.00  | 0.95       | 0.94       | 0.92          | 6.3E-01 | 4.6E-01 |
| <i>PTPRS</i>  | 1                 | 0.87  | 0.71       | 0.78       | 0.76          | 3.6E-09 | 1.5E-06 |
| <i>PTPRT</i>  | 1                 | 1.04  | 0.74       | 0.82       | 0.94          | 1.2E-02 | 5.8E-01 |
| <i>PTPRU</i>  | 1                 | 1.05  | 0.88       | 0.94       | 1.06          | 3.8E-01 | 7.8E-01 |
| <i>PTPRZ1</i> | 1                 | 0.96  | 0.46       | 0.51       | 0.54          | 1.1E-11 | 3.1E-08 |

Expression values are mean voom-derived counts-per-million normalized to PND7. FDR: false discovery rate significance tests performed with edgeR. PND: Postnatal day, EJ: Early Juvenile, LJ: Late Juvenile, LP: Late Puberty.

**Supplementary Table 5. mRNA primer sequences used in animal model work**

| Species       | Gene          | Accession number | Primers              | Sequence              | Amplicon (bp) |
|---------------|---------------|------------------|----------------------|-----------------------|---------------|
| Rat           | <i>Ptprz1</i> | NM_001170685.1   | rPtprz Fw            | CACAATGCAACAGTCCGGGT  | 170           |
|               |               |                  | rPtprz Rv            | TCTCAGGGTCAGCTTGACACA |               |
|               |               |                  | rPtprz short Fw      | CTCCATTCGCAGACGACTCA  | 91            |
|               |               |                  | rPtprz short Rv      | CAGACTCCAACCCCTCAGCTA |               |
|               | <i>Ptprn</i>  | NM_053881.1      | rPtprn Fw            | TGCCTGCTGTTGTTGAGCGG  | 167           |
|               |               |                  | rPtprn Rv            | GTGACTTGTAAGAGGGGCCGT |               |
| <i>Gapdh</i>  | NM_017008.4   | rGapdh Fw        | CTTCTTGTGCAGTGCCAGCC | 103                   |               |
|               |               | rGapdh Rv        | CAAGAGAAGGCAGCCCTGGT |                       |               |
| Rhesus Monkey | <i>PTPRZ1</i> | NM_001278382.1   | mkyPTPRZ Fw          | GGACAGCACATCCCCTAGAGT | 186           |
|               |               |                  | mkyPTPRZ Rv          | ACAGTACAGCTCTGCACTTCC |               |
|               | <i>PTPRN</i>  | XM_015111125.1   | mkyPTPRN Fw          | GGCCCCTTTTGCAAGTCACC  | 175           |
|               |               |                  | mkyPTPRN Rv          | CCAGACCTGTCCCTTGACG   |               |
|               | <i>GAPDH</i>  | NM_001195426.1   | mkyGAPDH Fw          | AAGGGCATCCTGGGCTACA   | 68            |
|               |               |                  | mkyGAPDH Rv          | GAAGAGTGGGTGTCGCTGTTG |               |

**Supplementary Figure 1. Concordance of a) effect allele frequencies and b) effect estimates of European-identified Menarche SNPs in available Chinese data v.s. Japanese BBJ data**

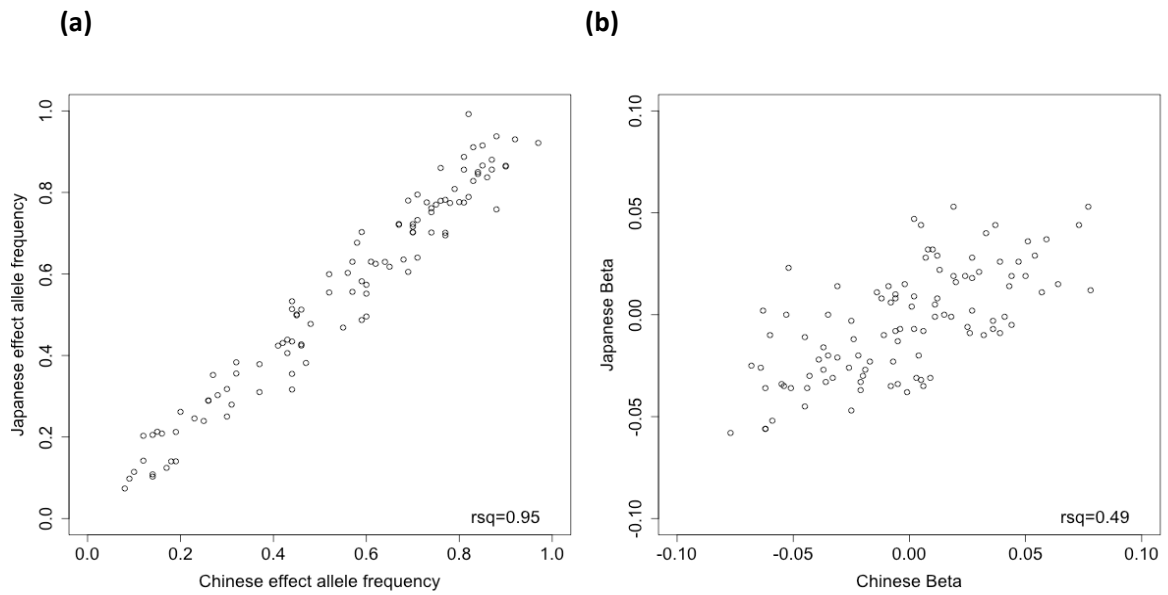

**Supplementary Figure 2. Concordance of a) effect allele frequencies and b) effect estimates of European-identified Menopause SNPs in available Chinese data v.s. Japanese BBJ data**

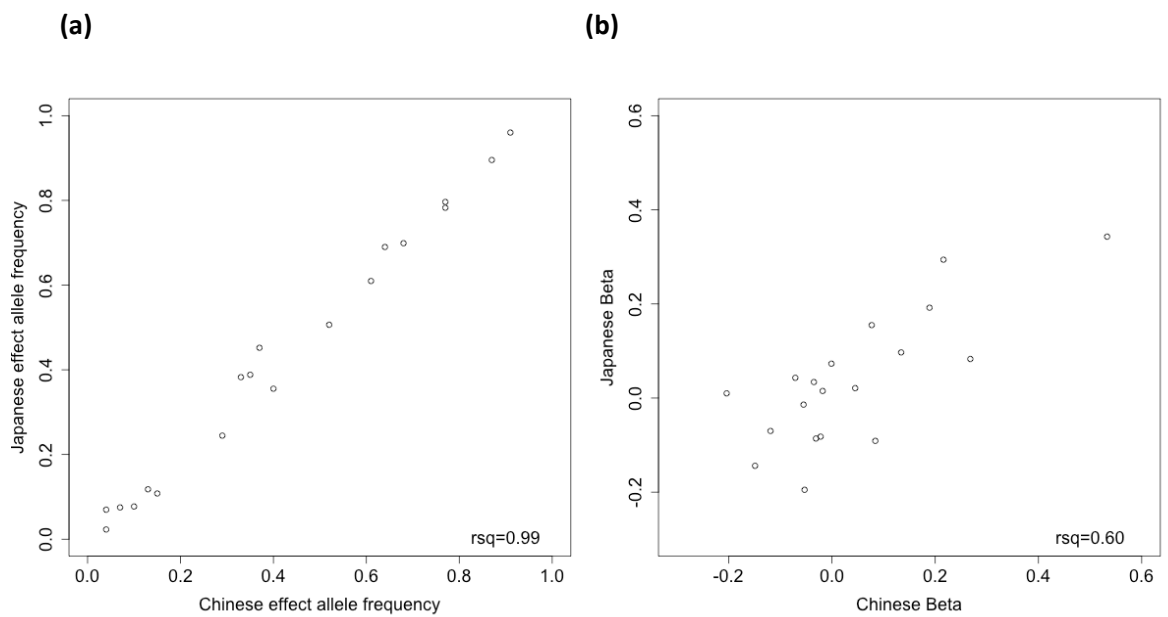

**Supplementary Figure 3. Tissue enrichment analysis performed using MAGMA for a) Menarche and b) Menopause**

(a)

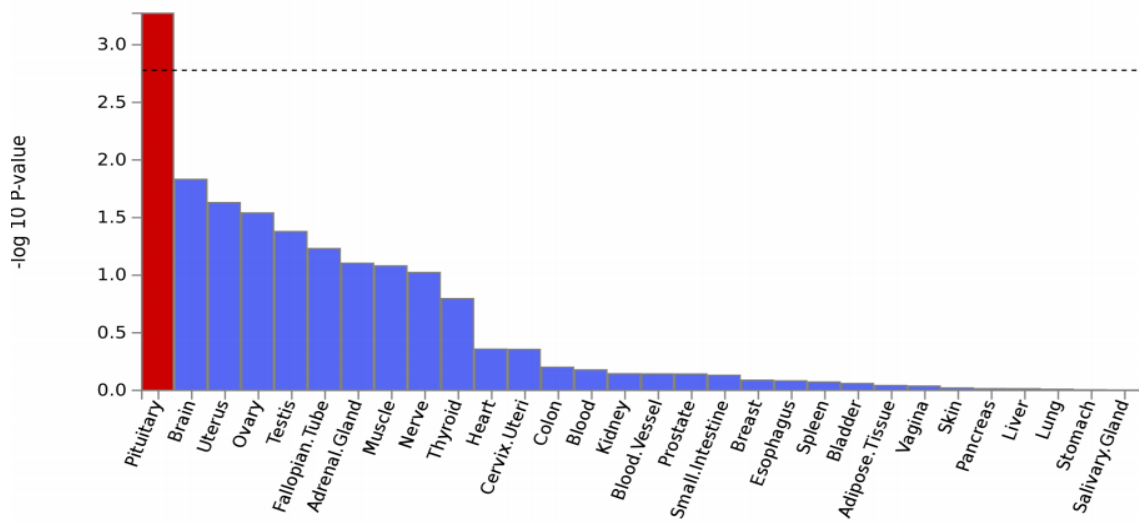

(b)

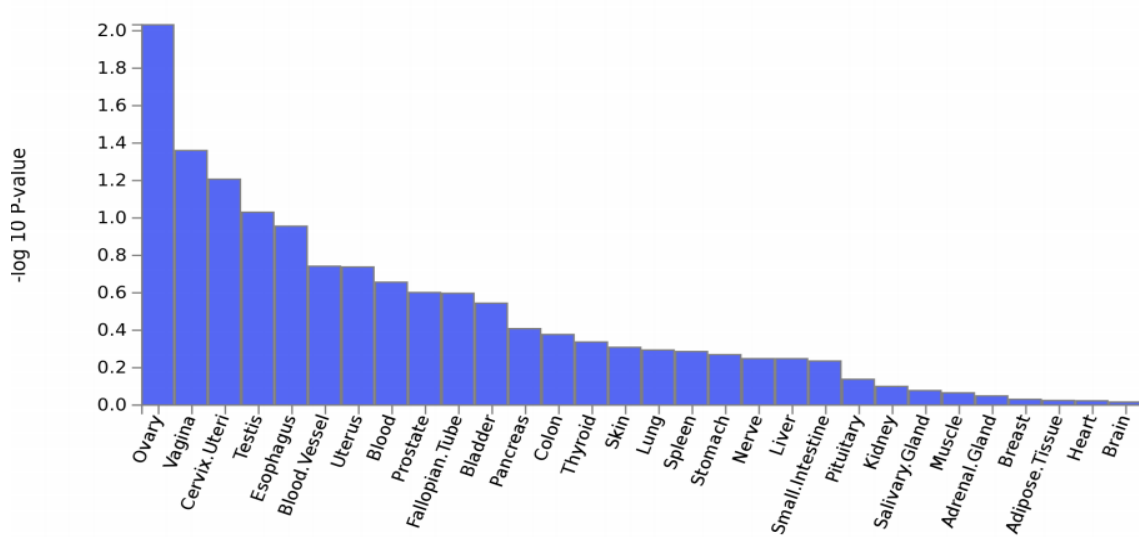

Supplement: 41467_2018_4398_MOESM1_ESM.pdf [file 41467_2018_4398_MOESM1_ESM.pdf]
