# Supplementary material for: Elucidating the genetic architecture of reproductive ageing in the Japanese population
Source: PubMed Central journal article supplement (PMC5958096; doi:10.1038/s41467-018-04398-z), 2018-05-17
Supplement: 41467_2018_4398_MOESM13_ESM.pdf [file 41467_2018_4398_MOESM13_ESM.pdf]

## Description of Additional Supplementary Files

File Name: Supplementary Data 1

Description: A lookup of the previously reported age at menarche loci in Biobank Japan.

File Name: Supplementary Data 2

Description: A lookup of the previously reported age at menopause loci in Biobank Japan.

File Name: Supplementary Data 3

Description: A lookup of previously reported age at menarche loci, discovered independent of UK Biobank, in Biobank Japan.

File Name: Supplementary Data 4

Description: Effects of identified SNPs after adjustment for Body Mass Index.

File Name: Supplementary Data 5

Description: MAGENTA pathway results for age at menarche.

File Name: Supplementary Data 6

Description: MAGENTA pathway results for age at menopause.

File Name: Supplementary Data 7

Description: HPG-axis Summary Mendelian Randomization (SMR) results for age at menarche.

File Name: Supplementary Data 8

Description: HPG-axis Summary Mendelian Randomization (SMR) results for age at menopause.

File Name: Supplementary Data 9

Description: SMR results for whole blood methylation analyses (menarche and menopause).

File Name: Supplementary Data 10

Description: A comparison of early vs late menarche effects for known menarche loci.

File Name: Supplementary Data 11

Description: Age at menarche conditional analyses at the PTPRD gene locus.
